# Supplementary material for: Exploring enantiopure zinc-scorpionates as catalysts for the preparation of polylactides, cyclic carbonates, and polycarbonates
Source: Royal Society of Chemistry journal article supplement (doi:10.1039/d4dt01526f), 2024-01-01
Supplement: d4dt01526f2.pdf [file d4dt01526f2.pdf]

## ELECTRONIC SUPPORTING INFORMATION 2

# Exploring Enantiopure Zinc-Scorpionates as Catalysts for the Preparation of Polylactides, Cyclic Carbonates, and Polycarbonates

*Marta Navarro,<sup>a,b</sup> Sonia Sobrino,<sup>a</sup> Israel Fernández,<sup>c</sup> Agustín Lara-Sánchez,<sup>a</sup> Andrés Garcés,<sup>\*b</sup> Luis F. Sánchez-Barba<sup>\*b</sup>*

*<sup>a</sup>Universidad de Castilla-La Mancha, Departamento de Química Inorgánica, Orgánica y Bioquímica-Centro de Innovación en Química Avanzada (ORFEO-CINQA), Campus Universitario, 13071-Ciudad Real, Spain.*

*<sup>b</sup>Universidad Rey Juan Carlos, Departamento de Biología y Geología, Física y Química Inorgánica, Móstoles-28933-Madrid, Spain. E-mail: [luisfernando.sanchezbarba@urjc.es](mailto:luisfernando.sanchezbarba@urjc.es); [andres.garces@urjc.es](mailto:andres.garces@urjc.es)*

*<sup>c</sup>Universidad Complutense de Madrid. Departamento de Química Orgánica I and Centro de Innovación en Química Avanzada (ORFEO-CINQA), Facultad de Ciencias Químicas, 28040, Madrid, Spain.*

# TABLE OF CONTENTS

## 1. DFT calculations

|                                  |     |
|----------------------------------|-----|
| 1.1. Computational Details ..... | S2  |
| Input coordinates .....          | S2  |
| 1.2. References.....             | S22 |

## 1.1. Computational Details

Density Functional Theory (DFT) calculations reported in this paper were performed with the Gaussian 16 package.<sup>1</sup> Electron correlation was partially taken into account using the hybrid functional usually denoted as B3LYP<sup>2</sup> in conjunction with the D3 dispersion correction suggested by Grimme et al.<sup>3</sup> using the double- $\zeta$  quality def2-SVP<sup>4</sup> basis set for all atoms. All species were characterized by frequency calculations and have positive definite Hessian matrices. The energetic diagrams are based on electronic energies corrected with zero-point vibrational energies. Transition states (TSs) showed only one negative eigenvalue in their diagonalized force constant matrices. Solvent effects (solvent = toluene) were taken into account using the Polarizable Continuum Model (PCM)<sup>5</sup> during the geometry optimizations. This level is therefore denoted PCM-(toluene)-B3LYP-D3/def2-SVP. The computed thermochemistry data were corrected following Grimme's quasi-harmonic (QHA) model for entropy<sup>6</sup> with a frequency cutoff value of 100.0 cm<sup>-1</sup> using the GoodVibes<sup>7</sup> program at 353.15 K

### 1.1.1. Cartesian coordinates and energies.

Cartesian coordinates (in Å) and total energies (in a.u., noncorrected ZVPE included) of all the stationary points discussed in the text.

#### 5a

ZVPE at 353.15 K: -1631.541265

Gibbs Energy at 353.15 K: -1631.635236

|   |              |              |              |
|---|--------------|--------------|--------------|
| N | -0.344234000 | -3.246324000 | -0.255816000 |
| N | -0.955529000 | -2.269200000 | -0.955270000 |
| N | -0.354996000 | -0.708515000 | 1.851010000  |
| N | -1.398855000 | -1.165608000 | 1.125281000  |
| C | -1.050103000 | -2.551331000 | -2.290058000 |
| C | -0.450135000 | -3.791016000 | -2.451168000 |
| H | -0.342326000 | -4.341848000 | -3.383423000 |
| C | -0.030400000 | -4.180625000 | -1.149944000 |
| C | -1.681478000 | -1.623609000 | -3.276233000 |
| H | -2.715333000 | -1.365464000 | -2.991615000 |
| H | -1.709753000 | -2.093689000 | -4.268427000 |
| H | -1.115664000 | -0.681395000 | -3.351005000 |
| C | 0.673103000  | -5.437082000 | -0.736875000 |
| H | 0.086871000  | -6.332722000 | -1.000824000 |
| H | 0.837043000  | -5.435831000 | 0.350028000  |
| H | 1.652170000  | -5.529083000 | -1.235604000 |
| C | -2.357233000 | -1.762384000 | 1.895193000  |
| C | -1.897079000 | -1.672588000 | 3.197678000  |
| H | -2.401863000 | -2.031341000 | 4.092143000  |
| C | -0.643484000 | -1.006877000 | 3.113870000  |
| C | -3.613014000 | -2.326969000 | 1.320872000  |
| H | -4.229751000 | -1.537404000 | 0.857841000  |
| H | -4.209410000 | -2.800298000 | 2.112249000  |
| H | -3.394720000 | -3.086321000 | 0.552695000  |
| C | 0.295299000  | -0.665291000 | 4.231804000  |
| H | 0.727083000  | 0.337166000  | 4.093361000  |
| H | 1.133547000  | -1.380257000 | 4.280378000  |
| H | -0.224952000 | -0.690493000 | 5.200456000  |

|   |              |              |              |
|---|--------------|--------------|--------------|
| C | -1.418521000 | -1.037270000 | -0.311075000 |
| H | -2.469812000 | -0.916923000 | -0.600277000 |
| C | -0.697904000 | 0.241871000  | -0.747079000 |
| C | -1.387788000 | 1.414046000  | -0.618431000 |
| C | -0.718005000 | 2.738687000  | -0.706002000 |
| C | 0.415612000  | 3.007359000  | 0.088893000  |
| C | 1.046747000  | 4.251791000  | 0.047080000  |
| H | 1.926155000  | 4.431746000  | 0.671264000  |
| C | 0.547626000  | 5.265868000  | -0.779265000 |
| H | 1.038185000  | 6.242078000  | -0.811479000 |
| C | -0.591936000 | 5.023483000  | -1.554276000 |
| H | -0.994965000 | 5.812599000  | -2.194918000 |
| C | -1.219684000 | 3.775016000  | -1.515812000 |
| H | -2.112850000 | 3.595022000  | -2.119491000 |
| C | -2.844565000 | 1.415038000  | -0.271407000 |
| C | -3.251646000 | 1.525008000  | 1.070082000  |
| H | -2.488405000 | 1.609769000  | 1.847257000  |
| C | -4.606068000 | 1.492978000  | 1.412355000  |
| H | -4.901956000 | 1.565961000  | 2.462162000  |
| C | -5.580619000 | 1.355669000  | 0.416892000  |
| H | -6.639957000 | 1.327899000  | 0.684948000  |
| C | -5.191604000 | 1.253710000  | -0.922777000 |
| H | -5.946522000 | 1.148003000  | -1.706508000 |
| C | -3.834574000 | 1.284902000  | -1.262375000 |
| H | -3.528649000 | 1.194568000  | -2.308213000 |
| H | 0.785051000  | 2.222993000  | 0.752831000  |
| C | 1.590932000  | -0.838983000 | -0.919623000 |
| H | 1.461026000  | -1.757919000 | -1.514483000 |
| H | 1.473745000  | -1.120362000 | 0.134352000  |
| C | 3.009385000  | -0.321166000 | -1.197587000 |
| H | 3.036123000  | -0.058903000 | -2.272421000 |
| C | 4.049832000  | -1.461692000 | -0.949847000 |
| H | 4.321841000  | -1.916717000 | -1.914334000 |
| H | 3.552528000  | -2.266451000 | -0.386870000 |
| C | 5.341858000  | -1.037368000 | -0.183085000 |
| H | 5.515052000  | -1.724623000 | 0.661283000  |
| H | 6.221318000  | -1.134581000 | -0.841606000 |
| C | 5.292670000  | 0.409599000  | 0.324475000  |
| H | 6.210905000  | 0.668436000  | 0.879266000  |
| C | 4.861112000  | 1.318640000  | -0.852623000 |
| H | 5.188936000  | 1.017512000  | -1.861642000 |
| H | 5.109171000  | 2.378213000  | -0.707951000 |
| C | 3.402953000  | 0.965951000  | -0.453891000 |
| H | 2.646976000  | 1.753529000  | -0.583148000 |
| C | 3.923798000  | 0.738019000  | 1.012577000  |
| C | 3.278894000  | -0.310054000 | 1.922217000  |
| H | 3.287577000  | -1.324910000 | 1.507966000  |
| H | 2.227892000  | -0.056005000 | 2.123999000  |
| H | 3.810168000  | -0.346870000 | 2.888615000  |
| C | 3.963277000  | 2.064891000  | 1.787657000  |
| H | 4.572744000  | 1.960342000  | 2.700777000  |
| H | 2.945105000  | 2.353120000  | 2.098383000  |
| H | 4.378979000  | 2.898729000  | 1.203626000  |
| N | 0.567221000  | 0.144149000  | -1.281222000 |
| H | 0.921905000  | 1.021865000  | -1.642781000 |

[5a-ZnMe<sub>2</sub>]

ZVPE at 353.15 K: -3490.462884

Gibbs Energy at 353.15 K: -3490.56514

|   |              |              |              |
|---|--------------|--------------|--------------|
| C | 3.528215000  | -1.057027000 | 1.457052000  |
| C | 4.637624000  | -1.278539000 | 0.658788000  |
| H | 5.635426000  | -1.551876000 | 0.993732000  |
| C | 4.205485000  | -1.057606000 | -0.672708000 |
| C | 5.004799000  | -1.126360000 | -1.935390000 |
| H | 4.372945000  | -1.444185000 | -2.777607000 |
| H | 5.839684000  | -1.833814000 | -1.830672000 |
| H | 5.423912000  | -0.138831000 | -2.188090000 |
| C | 3.348332000  | -1.123823000 | 2.937747000  |
| H | 3.088731000  | -0.135527000 | 3.353243000  |
| H | 4.279873000  | -1.458592000 | 3.412318000  |
| H | 2.542434000  | -1.820221000 | 3.218683000  |
| C | 0.555750000  | -3.066991000 | 0.625246000  |
| C | -0.352131000 | -3.885297000 | 1.280890000  |
| H | -0.553299000 | -4.929289000 | 1.050337000  |
| C | -0.926297000 | -3.092239000 | 2.307052000  |
| C | 1.496091000  | -3.426605000 | -0.481810000 |
| H | 1.430441000  | -2.764390000 | -1.356125000 |
| H | 1.273611000  | -4.448883000 | -0.815438000 |
| H | 2.543899000  | -3.396098000 | -0.143197000 |
| C | -1.964534000 | -3.478821000 | 3.313651000  |
| H | -1.612260000 | -4.300678000 | 3.958202000  |
| H | -2.885883000 | -3.825529000 | 2.818468000  |
| H | -2.215153000 | -2.618508000 | 3.949637000  |
| C | 1.129268000  | -0.555159000 | 1.022662000  |
| C | 0.317184000  | 0.390562000  | 0.140106000  |
| C | 0.032704000  | 1.643076000  | 0.605916000  |
| C | -0.588944000 | 2.741130000  | -0.187546000 |
| C | -0.223044000 | 3.003478000  | -1.521448000 |
| H | 0.526394000  | 2.376102000  | -1.999538000 |
| C | -0.802299000 | 4.055771000  | -2.231481000 |
| H | -0.494479000 | 4.239166000  | -3.264301000 |
| C | -1.764707000 | 4.872736000  | -1.627928000 |
| H | -2.220867000 | 5.694190000  | -2.186305000 |
| C | -2.130332000 | 4.633315000  | -0.299083000 |
| H | -2.877614000 | 5.266083000  | 0.186905000  |
| C | -1.541820000 | 3.587693000  | 0.415195000  |
| H | -1.828864000 | 3.416157000  | 1.454775000  |
| C | 0.365580000  | 2.029311000  | 2.016681000  |
| C | -0.314489000 | 1.472765000  | 3.114774000  |
| H | -1.067022000 | 0.701658000  | 2.938724000  |
| C | 0.001507000  | 1.863504000  | 4.420256000  |
| H | -0.532025000 | 1.414850000  | 5.262276000  |
| C | 0.994287000  | 2.821402000  | 4.647983000  |
| H | 1.240556000  | 3.126775000  | 5.668247000  |
| C | 1.669774000  | 3.389859000  | 3.561008000  |
| H | 2.447264000  | 4.139470000  | 3.730262000  |
| C | 1.352922000  | 3.001494000  | 2.257230000  |
| H | 1.876130000  | 3.447963000  | 1.407769000  |
| N | 2.913686000  | -0.731421000 | -0.688917000 |
| N | 2.509706000  | -0.723385000 | 0.604347000  |
| N | -0.411776000 | -1.867383000 | 2.286159000  |
| N | 0.482629000  | -1.853329000 | 1.266880000  |
| N | 0.004771000  | -0.136729000 | -1.118764000 |

|    |              |              |              |
|----|--------------|--------------|--------------|
| H  | 1.168674000  | -0.102371000 | 2.013314000  |
| C  | -1.262375000 | 0.093130000  | -1.832898000 |
| H  | -1.025603000 | 0.287100000  | -2.892006000 |
| H  | -1.737531000 | 0.994201000  | -1.441964000 |
| C  | -2.224120000 | -1.098350000 | -1.731212000 |
| H  | -1.646522000 | -1.995132000 | -2.025384000 |
| C  | -3.415525000 | -0.942852000 | -2.726457000 |
| H  | -3.197549000 | -1.512066000 | -3.642805000 |
| H  | -3.463515000 | 0.108064000  | -3.051100000 |
| C  | -4.808834000 | -1.356893000 | -2.158920000 |
| H  | -5.549389000 | -0.574106000 | -2.391861000 |
| H  | -5.164334000 | -2.273287000 | -2.659236000 |
| C  | -4.788380000 | -1.624076000 | -0.646841000 |
| H  | -5.798486000 | -1.863301000 | -0.272136000 |
| C  | -3.634653000 | -2.612979000 | -0.344191000 |
| H  | -3.409020000 | -3.369503000 | -1.113994000 |
| H  | -3.726232000 | -3.120524000 | 0.624072000  |
| C  | -2.715018000 | -1.364680000 | -0.301069000 |
| H  | -1.883204000 | -1.370518000 | 0.412092000  |
| C  | -3.977596000 | -0.528107000 | 0.123825000  |
| C  | -4.141478000 | 0.938196000  | -0.284905000 |
| H  | -4.044375000 | 1.119366000  | -1.361386000 |
| H  | -3.396902000 | 1.571223000  | 0.222281000  |
| H  | -5.138760000 | 1.300536000  | 0.017066000  |
| C  | -4.182111000 | -0.605605000 | 1.645367000  |
| H  | -5.185775000 | -0.240166000 | 1.919990000  |
| H  | -3.439719000 | 0.028301000  | 2.157894000  |
| H  | -4.073976000 | -1.622162000 | 2.047802000  |
| H  | 0.240409000  | -1.121402000 | -1.176461000 |
| Zn | 1.986125000  | 0.128992000  | -2.633666000 |
| C  | 1.410381000  | -1.450762000 | -3.753062000 |
| H  | 0.452214000  | -1.903550000 | -3.435369000 |
| H  | 1.280143000  | -1.175307000 | -4.815547000 |
| H  | 2.158579000  | -2.265475000 | -3.733845000 |
| C  | 2.877266000  | 1.929117000  | -2.517769000 |
| H  | 2.489861000  | 2.693679000  | -3.214313000 |
| H  | 3.953182000  | 1.812216000  | -2.748833000 |
| H  | 2.816213000  | 2.351568000  | -1.498808000 |

**TS-[5a-ZnMe<sub>2</sub>]**

ZVPE at 353.15 K: -3490.462884

Gibbs Energy at 353.15 K: -3490.56514

|   |              |              |              |
|---|--------------|--------------|--------------|
| C | 3.829429000  | 0.152449000  | 0.646368000  |
| C | 4.725257000  | -0.054698000 | -0.392701000 |
| H | 5.778726000  | 0.213175000  | -0.403962000 |
| C | 3.986966000  | -0.663649000 | -1.429889000 |
| C | 4.462894000  | -1.123613000 | -2.770243000 |
| H | 5.331728000  | -0.534743000 | -3.095724000 |
| H | 3.665432000  | -1.031288000 | -3.520608000 |
| H | 4.768841000  | -2.182519000 | -2.733759000 |
| C | 4.030108000  | 0.777282000  | 1.987526000  |
| H | 3.432596000  | 1.697593000  | 2.094654000  |
| H | 5.088299000  | 1.038245000  | 2.117909000  |
| H | 3.741823000  | 0.093714000  | 2.802140000  |
| C | 1.702474000  | -2.739812000 | 1.723111000  |
| C | 0.874950000  | -3.538828000 | 2.498651000  |
| H | 1.093542000  | -4.551499000 | 2.831218000  |
| C | -0.293608000 | -2.774879000 | 2.740777000  |
| C | 3.059304000  | -3.074760000 | 1.190626000  |
| H | 3.094830000  | -3.019311000 | 0.093471000  |
| H | 3.311476000  | -4.101104000 | 1.489582000  |
| H | 3.844459000  | -2.408911000 | 1.580253000  |
| C | -1.533663000 | -3.168254000 | 3.482092000  |
| H | -2.207998000 | -3.756685000 | 2.836808000  |
| H | -2.083483000 | -2.275227000 | 3.810326000  |
| H | -1.294571000 | -3.784642000 | 4.361978000  |
| C | 1.376502000  | -0.275833000 | 0.956610000  |
| C | 0.291106000  | 0.396783000  | 0.102818000  |
| C | 0.172673000  | 1.772626000  | 0.236437000  |
| C | -0.290121000 | 2.642197000  | -0.874842000 |
| C | 0.138307000  | 2.414322000  | -2.200103000 |
| H | 0.793026000  | 1.565777000  | -2.409854000 |
| C | -0.268189000 | 3.245519000  | -3.244263000 |
| H | 0.078372000  | 3.041854000  | -4.261203000 |
| C | -1.110842000 | 4.335284000  | -2.994330000 |
| H | -1.431629000 | 4.985136000  | -3.812530000 |
| C | -1.534559000 | 4.585071000  | -1.684051000 |
| H | -2.192727000 | 5.432712000  | -1.474008000 |
| C | -1.126405000 | 3.753050000  | -0.639509000 |
| H | -1.465219000 | 3.955868000  | 0.379092000  |
| C | 0.562744000  | 2.458134000  | 1.496966000  |
| C | 0.123196000  | 1.981168000  | 2.751793000  |
| H | -0.524626000 | 1.100883000  | 2.781318000  |
| C | 0.522803000  | 2.600745000  | 3.939436000  |
| H | 0.174806000  | 2.205299000  | 4.897672000  |
| C | 1.348701000  | 3.729184000  | 3.905081000  |
| H | 1.655334000  | 4.218486000  | 4.833097000  |
| C | 1.768932000  | 4.233650000  | 2.667377000  |
| H | 2.411169000  | 5.117844000  | 2.627432000  |
| C | 1.379477000  | 3.608726000  | 1.481233000  |
| H | 1.718977000  | 4.003627000  | 0.520641000  |
| N | 2.715123000  | -0.820758000 | -1.044537000 |
| N | 2.628881000  | -0.335001000 | 0.220732000  |
| N | -0.192269000 | -1.585105000 | 2.157189000  |
| N | 1.000951000  | -1.575339000 | 1.523044000  |
| N | -0.305319000 | -0.415691000 | -0.818858000 |

|    |              |              |              |
|----|--------------|--------------|--------------|
| H  | 1.581114000  | 0.386198000  | 1.799114000  |
| C  | -1.566067000 | -0.036069000 | -1.457845000 |
| H  | -1.413728000 | 0.098144000  | -2.544487000 |
| H  | -1.896163000 | 0.936563000  | -1.083245000 |
| C  | -2.694782000 | -1.055583000 | -1.230075000 |
| H  | -2.337712000 | -2.032389000 | -1.595920000 |
| C  | -3.959824000 | -0.657480000 | -2.055018000 |
| H  | -3.998137000 | -1.259025000 | -2.976267000 |
| H  | -3.838198000 | 0.381158000  | -2.401335000 |
| C  | -5.316212000 | -0.773881000 | -1.291147000 |
| H  | -5.893410000 | 0.157532000  | -1.415353000 |
| H  | -5.932307000 | -1.575747000 | -1.732228000 |
| C  | -5.142263000 | -1.082650000 | 0.202406000  |
| H  | -6.119396000 | -1.121756000 | 0.715200000  |
| C  | -4.186011000 | -2.294312000 | 0.339673000  |
| H  | -4.231436000 | -3.056567000 | -0.456290000 |
| H  | -4.252014000 | -2.802635000 | 1.311052000  |
| C  | -3.029865000 | -1.261087000 | 0.255335000  |
| H  | -2.117462000 | -1.447265000 | 0.835560000  |
| C  | -4.026113000 | -0.197836000 | 0.852532000  |
| C  | -3.938909000 | 1.284063000  | 0.473921000  |
| H  | -3.968518000 | 1.475231000  | -0.604860000 |
| H  | -3.007447000 | 1.728851000  | 0.860580000  |
| H  | -4.780591000 | 1.836146000  | 0.926312000  |
| C  | -4.041974000 | -0.274813000 | 2.387732000  |
| H  | -4.898480000 | 0.288986000  | 2.794725000  |
| H  | -3.119366000 | 0.167928000  | 2.797823000  |
| H  | -4.110386000 | -1.303311000 | 2.768770000  |
| H  | -0.091404000 | -1.725547000 | -0.830682000 |
| Zn | 1.089789000  | -1.437491000 | -2.239544000 |
| C  | 0.132140000  | -3.133392000 | -1.118945000 |
| H  | -0.407920000 | -3.311499000 | -0.174016000 |
| H  | -0.479454000 | -3.577334000 | -1.922985000 |
| H  | 1.064459000  | -3.718999000 | -1.027819000 |
| C  | 1.036492000  | -1.136423000 | -4.208234000 |
| H  | -0.003767000 | -1.166874000 | -4.576621000 |
| H  | 1.602830000  | -1.898908000 | -4.771357000 |
| H  | 1.450208000  | -0.149589000 | -4.482136000 |



[κ<sup>2</sup>-5a-ZnMe]

ZVPE at 353.15 K: -3450.041113

Gibbs Energy at 353.15 K: -3450.138091

|   |              |              |              |
|---|--------------|--------------|--------------|
| C | -3.948443000 | 0.262231000  | -0.007353000 |
| C | -4.596234000 | 0.860090000  | -1.081218000 |
| H | -5.653135000 | 0.780644000  | -1.323516000 |
| C | -3.602516000 | 1.573100000  | -1.791465000 |
| C | -3.727828000 | 2.397763000  | -3.031593000 |
| H | -2.789602000 | 2.934512000  | -3.230292000 |
| H | -4.541628000 | 3.132557000  | -2.933654000 |
| H | -3.958445000 | 1.764370000  | -3.903497000 |
| C | -4.467106000 | -0.624242000 | 1.076131000  |
| H | -3.982092000 | -1.613960000 | 1.050645000  |
| H | -5.548819000 | -0.765416000 | 0.954429000  |
| H | -4.286983000 | -0.191128000 | 2.073274000  |
| C | -1.496406000 | 2.639946000  | 1.784423000  |
| C | -0.652589000 | 3.167547000  | 2.751620000  |
| H | -0.714047000 | 4.168590000  | 3.173832000  |
| C | 0.274585000  | 2.144581000  | 3.065237000  |
| C | -2.656506000 | 3.329093000  | 1.133831000  |
| H | -2.440331000 | 3.600795000  | 0.089998000  |
| H | -2.864941000 | 4.255181000  | 1.686547000  |
| H | -3.572822000 | 2.721340000  | 1.132003000  |
| C | 1.423451000  | 2.192505000  | 4.023741000  |
| H | 1.152505000  | 2.734953000  | 4.942489000  |
| H | 2.287989000  | 2.710990000  | 3.575576000  |
| H | 1.746033000  | 1.176954000  | 4.290565000  |
| C | -1.538374000 | 0.232906000  | 0.754940000  |
| C | -0.454657000 | -0.470727000 | -0.083613000 |
| C | -0.460784000 | -1.864793000 | -0.072518000 |
| C | 0.041594000  | -2.656520000 | -1.222052000 |
| C | -0.218194000 | -2.259616000 | -2.551787000 |
| H | -0.774980000 | -1.335462000 | -2.724605000 |
| C | 0.223337000  | -3.018719000 | -3.636300000 |
| H | 0.003712000  | -2.685259000 | -4.654644000 |
| C | 0.936877000  | -4.204956000 | -3.427357000 |
| H | 1.285054000  | -4.798823000 | -4.276358000 |
| C | 1.195824000  | -4.621380000 | -2.116195000 |
| H | 1.753238000  | -5.544940000 | -1.935893000 |
| C | 0.752091000  | -3.861643000 | -1.032314000 |
| H | 0.962943000  | -4.196671000 | -0.013941000 |
| C | -1.029351000 | -2.632308000 | 1.065099000  |
| C | -0.715330000 | -2.312223000 | 2.405044000  |
| H | -0.023007000 | -1.489826000 | 2.599550000  |
| C | -1.290801000 | -3.012410000 | 3.470004000  |
| H | -1.034542000 | -2.735759000 | 4.496719000  |
| C | -2.173199000 | -4.070337000 | 3.229746000  |
| H | -2.615943000 | -4.623142000 | 4.062365000  |
| C | -2.474079000 | -4.421057000 | 1.906646000  |
| H | -3.159822000 | -5.248518000 | 1.703250000  |
| C | -1.910902000 | -3.714525000 | 0.843116000  |
| H | -2.159394000 | -3.991609000 | -0.184350000 |
| N | -2.424521000 | 1.414622000  | -1.185188000 |
| N | -2.639808000 | 0.631069000  | -0.102887000 |
| N | 0.024018000  | 1.060623000  | 2.339162000  |
| N | -1.032594000 | 1.363444000  | 1.552409000  |
| N | 0.298218000  | 0.366741000  | -0.836320000 |

|    |              |              |              |
|----|--------------|--------------|--------------|
| H  | -1.957756000 | -0.492536000 | 1.454438000  |
| C  | 1.575037000  | -0.063957000 | -1.385109000 |
| H  | 1.510765000  | -0.192176000 | -2.483805000 |
| H  | 1.842698000  | -1.051042000 | -0.991728000 |
| C  | 2.707819000  | 0.925257000  | -1.063600000 |
| H  | 2.351157000  | 1.927647000  | -1.367035000 |
| C  | 3.996451000  | 0.594412000  | -1.878914000 |
| H  | 4.051235000  | 1.255751000  | -2.757644000 |
| H  | 3.893617000  | -0.420229000 | -2.294839000 |
| C  | 5.330814000  | 0.672465000  | -1.073934000 |
| H  | 5.926514000  | -0.238073000 | -1.253465000 |
| H  | 5.944490000  | 1.515059000  | -1.435431000 |
| C  | 5.112016000  | 0.862229000  | 0.433315000  |
| H  | 6.073615000  | 0.867562000  | 0.975924000  |
| C  | 4.141657000  | 2.052875000  | 0.639913000  |
| H  | 4.201854000  | 2.876327000  | -0.091652000 |
| H  | 4.178932000  | 2.482655000  | 1.650062000  |
| C  | 2.997416000  | 1.022451000  | 0.442050000  |
| H  | 2.061717000  | 1.156657000  | 1.000730000  |
| C  | 3.986686000  | -0.078781000 | 0.981099000  |
| C  | 3.923938000  | -1.527165000 | 0.484822000  |
| H  | 3.970107000  | -1.632532000 | -0.604983000 |
| H  | 2.994115000  | -2.013121000 | 0.823419000  |
| H  | 4.767269000  | -2.101857000 | 0.904911000  |
| C  | 3.967496000  | -0.125367000 | 2.517156000  |
| H  | 4.824774000  | -0.707540000 | 2.895756000  |
| H  | 3.044327000  | -0.614298000 | 2.868824000  |
| H  | 4.009779000  | 0.869037000  | 2.982007000  |
| Zn | -0.419810000 | 2.033430000  | -1.567685000 |
| C  | -0.107127000 | 3.724613000  | -2.551919000 |
| H  | 0.924330000  | 4.094815000  | -2.425703000 |
| H  | -0.789631000 | 4.522002000  | -2.208031000 |
| H  | -0.277699000 | 3.597109000  | -3.636089000 |

[ $\kappa^3$ -5a-ZnMe]

ZVPE at 353.15 K: -3450.062353

Gibbs Energy at 353.15 K: -3490.56514

|    |              |              |              |
|----|--------------|--------------|--------------|
| Zn | -1.298256000 | -1.831414000 | -1.211544000 |
| N  | -1.251880000 | -2.067944000 | 0.921990000  |
| N  | -0.087506000 | -1.697874000 | 1.504507000  |
| N  | 0.682876000  | -2.723584000 | -1.146286000 |
| N  | 1.503008000  | -2.201790000 | -0.205851000 |
| N  | -0.444529000 | -0.016453000 | -0.899867000 |
| C  | -0.114960000 | -1.928492000 | 2.851738000  |
| C  | -1.378895000 | -2.432380000 | 3.130113000  |
| H  | -1.754384000 | -2.724343000 | 4.107958000  |
| C  | -2.055330000 | -2.504151000 | 1.889470000  |
| C  | 1.052795000  | -1.713160000 | 3.755989000  |
| H  | 1.898473000  | -2.363419000 | 3.477306000  |
| H  | 0.768768000  | -1.955263000 | 4.788461000  |
| H  | 1.414720000  | -0.675586000 | 3.730894000  |
| C  | -3.451959000 | -2.938716000 | 1.582059000  |
| H  | -4.175760000 | -2.170837000 | 1.902494000  |
| H  | -3.704471000 | -3.873755000 | 2.104434000  |
| H  | -3.573461000 | -3.087251000 | 0.499464000  |
| C  | 2.773952000  | -2.678876000 | -0.325864000 |
| C  | 2.748572000  | -3.569125000 | -1.392285000 |
| H  | 3.589619000  | -4.143075000 | -1.774058000 |
| C  | 1.416807000  | -3.564398000 | -1.874636000 |
| C  | 3.895136000  | -2.239714000 | 0.557382000  |
| H  | 4.050929000  | -1.150474000 | 0.498273000  |
| H  | 4.824751000  | -2.738825000 | 0.254543000  |
| H  | 3.705071000  | -2.490505000 | 1.613912000  |
| C  | 0.808034000  | -4.327952000 | -3.006699000 |
| H  | -0.243514000 | -4.034854000 | -3.137404000 |
| H  | 0.848098000  | -5.413265000 | -2.820131000 |
| H  | 1.347678000  | -4.135406000 | -3.947408000 |
| C  | 0.996739000  | -1.158225000 | 0.688242000  |
| H  | 1.808533000  | -0.911539000 | 1.373002000  |
| C  | 0.657104000  | 0.095398000  | -0.151883000 |
| C  | -1.075875000 | 1.158887000  | -1.466095000 |
| H  | -0.977249000 | 1.169278000  | -2.569269000 |
| H  | -0.575443000 | 2.070266000  | -1.116910000 |
| C  | -2.572735000 | 1.222800000  | -1.101384000 |
| H  | -3.046737000 | 0.333585000  | -1.555397000 |
| C  | -3.247488000 | 2.500116000  | -1.695011000 |
| H  | -3.832885000 | 2.220740000  | -2.584194000 |
| H  | -2.458125000 | 3.168690000  | -2.074193000 |
| C  | -4.152954000 | 3.300941000  | -0.704211000 |
| H  | -3.844291000 | 4.359287000  | -0.686551000 |
| H  | -5.197258000 | 3.294350000  | -1.059373000 |
| C  | -4.138591000 | 2.734088000  | 0.722200000  |
| H  | -4.785777000 | 3.327222000  | 1.391651000  |
| C  | -4.365772000 | 1.203527000  | 0.637836000  |
| H  | -5.017608000 | 0.839841000  | -0.173970000 |
| H  | -4.701871000 | 0.753130000  | 1.581684000  |
| C  | -2.834546000 | 1.096688000  | 0.407294000  |
| H  | -2.312229000 | 0.219442000  | 0.811074000  |
| C  | -2.680461000 | 2.437790000  | 1.212097000  |
| C  | -1.573319000 | 3.443233000  | 0.881476000  |
| H  | -1.692556000 | 4.348461000  | 1.501202000  |

|   |              |              |              |
|---|--------------|--------------|--------------|
| H | -1.563480000 | 3.765280000  | -0.166261000 |
| H | -0.580288000 | 3.019000000  | 1.101843000  |
| C | -2.613622000 | 2.153312000  | 2.720926000  |
| H | -2.744175000 | 3.082888000  | 3.300164000  |
| H | -1.628349000 | 1.730929000  | 2.981849000  |
| H | -3.375358000 | 1.437531000  | 3.061857000  |
| C | -2.761450000 | -2.585838000 | -2.335466000 |
| H | -2.846686000 | -3.681509000 | -2.217996000 |
| H | -2.607670000 | -2.388632000 | -3.411582000 |
| H | -3.744678000 | -2.156782000 | -2.070834000 |
| C | 1.624238000  | 1.119749000  | -0.165222000 |
| C | 1.863646000  | 1.929944000  | -1.378655000 |
| C | 1.756606000  | 1.366294000  | -2.672023000 |
| H | 1.461022000  | 0.318809000  | -2.767431000 |
| C | 2.017486000  | 2.116689000  | -3.818056000 |
| H | 1.928223000  | 1.645726000  | -4.801385000 |
| C | 2.399655000  | 3.460586000  | -3.718354000 |
| H | 2.603005000  | 4.048433000  | -4.617092000 |
| C | 2.514991000  | 4.037994000  | -2.448743000 |
| H | 2.805981000  | 5.087884000  | -2.350072000 |
| C | 2.251089000  | 3.287637000  | -1.301281000 |
| H | 2.336775000  | 3.759334000  | -0.319644000 |
| C | 2.435301000  | 1.411223000  | 1.033108000  |
| C | 1.844032000  | 1.487359000  | 2.314965000  |
| H | 0.760836000  | 1.365882000  | 2.398136000  |
| C | 2.606364000  | 1.742703000  | 3.460662000  |
| H | 2.113419000  | 1.798678000  | 4.435563000  |
| C | 3.984280000  | 1.950634000  | 3.360216000  |
| H | 4.580572000  | 2.159771000  | 4.251831000  |
| C | 4.589095000  | 1.905025000  | 2.094892000  |
| H | 5.666212000  | 2.069425000  | 1.999957000  |
| C | 3.830440000  | 1.643288000  | 0.955497000  |
| H | 4.315069000  | 1.608123000  | -0.023279000 |

## 6c

ZVPE at 353.15 K: -1631.583545

Gibbs Energy at 353.15 K: -1631.677195

|   |              |              |              |
|---|--------------|--------------|--------------|
| C | 3.073204000  | -2.160797000 | -0.359816000 |
| C | 3.988836000  | -2.269792000 | -1.392336000 |
| H | 4.974773000  | -2.727436000 | -1.341141000 |
| C | 3.372598000  | -1.649936000 | -2.515443000 |
| C | 3.928798000  | -1.479076000 | -3.895900000 |
| H | 3.197986000  | -0.969917000 | -4.540259000 |
| H | 4.174990000  | -2.452759000 | -4.350760000 |
| H | 4.856277000  | -0.882862000 | -3.882729000 |
| C | 3.137709000  | -2.566495000 | 1.074884000  |
| H | 3.039752000  | -1.686332000 | 1.731107000  |
| H | 4.096485000  | -3.058643000 | 1.287104000  |
| H | 2.316924000  | -3.249585000 | 1.341841000  |
| C | -0.642686000 | -3.177669000 | -0.683643000 |
| C | -1.375191000 | -4.019873000 | 0.136489000  |
| H | -1.986629000 | -4.862628000 | -0.179353000 |
| C | -1.148920000 | -3.555878000 | 1.461920000  |
| C | -0.438652000 | -3.174529000 | -2.162019000 |
| H | -0.388102000 | -2.151272000 | -2.558628000 |
| H | -1.254467000 | -3.718794000 | -2.657850000 |
| H | 0.514879000  | -3.658668000 | -2.430423000 |
| C | -1.716177000 | -4.092178000 | 2.740166000  |
| H | -1.494184000 | -5.165011000 | 2.860012000  |
| H | -2.813347000 | -3.981486000 | 2.764980000  |
| H | -1.294868000 | -3.549140000 | 3.598095000  |
| C | 0.786455000  | -1.176094000 | -0.205872000 |
| C | 0.504554000  | 0.120003000  | 0.123146000  |
| C | 1.606307000  | 1.174059000  | -0.019606000 |
| H | 2.355549000  | 0.761171000  | -0.704812000 |
| C | 2.331342000  | 1.433802000  | 1.301401000  |
| C | 1.951538000  | 0.835266000  | 2.511996000  |
| H | 1.092130000  | 0.163480000  | 2.543638000  |
| C | 2.678038000  | 1.077785000  | 3.684677000  |
| H | 2.367331000  | 0.599482000  | 4.617244000  |
| C | 3.792446000  | 1.919417000  | 3.666063000  |
| H | 4.357820000  | 2.107071000  | 4.582457000  |
| C | 4.182639000  | 2.516717000  | 2.461329000  |
| H | 5.057351000  | 3.171759000  | 2.431374000  |
| C | 3.459437000  | 2.272618000  | 1.292843000  |
| H | 3.769358000  | 2.740824000  | 0.354542000  |
| C | 1.045132000  | 2.418600000  | -0.706878000 |
| C | 0.758076000  | 2.339223000  | -2.080276000 |
| H | 1.003601000  | 1.417721000  | -2.616541000 |
| C | 0.153791000  | 3.408337000  | -2.743372000 |
| H | -0.065552000 | 3.330367000  | -3.811391000 |
| C | -0.175302000 | 4.575933000  | -2.043000000 |
| H | -0.652406000 | 5.411780000  | -2.560820000 |
| C | 0.111569000  | 4.665598000  | -0.678973000 |
| H | -0.139005000 | 5.573513000  | -0.124270000 |
| C | 0.721092000  | 3.593397000  | -0.014613000 |
| H | 0.948191000  | 3.674769000  | 1.050964000  |
| C | -1.991909000 | 0.040479000  | 0.615241000  |
| H | -1.892939000 | -1.040704000 | 0.542631000  |
| C | -2.845057000 | 0.401204000  | 1.867855000  |
| H | -3.017217000 | -0.486922000 | 2.492747000  |

|   |              |              |              |
|---|--------------|--------------|--------------|
| H | -2.332989000 | 1.139751000  | 2.503996000  |
| C | -4.145030000 | 0.968724000  | 1.259711000  |
| H | -5.008346000 | 0.941195000  | 1.942274000  |
| C | -3.812420000 | 2.378386000  | 0.719176000  |
| H | -3.281313000 | 2.983349000  | 1.470738000  |
| H | -4.723424000 | 2.934534000  | 0.452551000  |
| C | -2.938281000 | 2.071433000  | -0.533113000 |
| H | -3.393433000 | 2.462447000  | -1.454993000 |
| H | -1.935209000 | 2.518537000  | -0.490260000 |
| C | -2.881784000 | 0.523620000  | -0.578469000 |
| C | -4.308606000 | 0.129000000  | -0.044988000 |
| C | -4.516925000 | -1.377067000 | 0.201035000  |
| H | -5.502542000 | -1.547481000 | 0.664111000  |
| H | -3.765422000 | -1.843197000 | 0.851254000  |
| H | -4.502641000 | -1.928757000 | -0.752601000 |
| C | -5.465094000 | 0.588687000  | -0.948444000 |
| H | -5.481756000 | -0.000281000 | -1.879708000 |
| H | -5.418219000 | 1.647689000  | -1.233227000 |
| H | -6.429558000 | 0.426074000  | -0.439747000 |
| C | -2.448684000 | -0.045311000 | -1.918051000 |
| H | -1.417567000 | 0.261738000  | -2.154399000 |
| H | -3.099140000 | 0.310914000  | -2.733037000 |
| H | -2.478152000 | -1.145364000 | -1.911156000 |
| N | 2.160365000  | -1.203204000 | -2.201969000 |
| N | 1.984015000  | -1.515983000 | -0.887204000 |
| N | -0.330751000 | -2.507557000 | 1.461605000  |
| N | -0.034780000 | -2.274289000 | 0.152672000  |
| N | -0.653562000 | 0.599663000  | 0.661673000  |
| H | -0.629051000 | 1.593096000  | 0.858278000  |

**6c-ZnMe<sub>2</sub>**

ZVPE at 353.15 K: -3490.498996

Gibbs Energy at 353.15 K: -3490.602689

|   |              |              |              |
|---|--------------|--------------|--------------|
| C | -3.107068000 | -0.851860000 | 1.529690000  |
| C | -3.899294000 | -0.398019000 | 2.568958000  |
| H | -4.933491000 | -0.674191000 | 2.763348000  |
| C | -3.085218000 | 0.510013000  | 3.301132000  |
| C | -3.451552000 | 1.308398000  | 4.514299000  |
| H | -2.582875000 | 1.880839000  | 4.869635000  |
| H | -3.799107000 | 0.656329000  | 5.332297000  |
| H | -4.267985000 | 2.016463000  | 4.294405000  |
| C | -3.389202000 | -1.793016000 | 0.411848000  |
| H | -3.155551000 | -1.328838000 | -0.556939000 |
| H | -4.449046000 | -2.079628000 | 0.412150000  |
| H | -2.780241000 | -2.706859000 | 0.479426000  |
| C | 0.205737000  | -2.447693000 | 1.991734000  |
| C | 0.694444000  | -3.652939000 | 1.506858000  |
| H | 1.102247000  | -4.472825000 | 2.093322000  |
| C | 0.544985000  | -3.595120000 | 0.102851000  |
| C | 0.056897000  | -1.945906000 | 3.388360000  |
| H | 0.270444000  | -0.870854000 | 3.456500000  |
| H | 0.728825000  | -2.497778000 | 4.059723000  |
| H | -0.978256000 | -2.082219000 | 3.742960000  |
| C | 0.926598000  | -4.613706000 | -0.924973000 |
| H | 1.190280000  | -5.568814000 | -0.450474000 |
| H | 1.793970000  | -4.272399000 | -1.513939000 |
| H | 0.096167000  | -4.786532000 | -1.627450000 |
| C | -0.727940000 | -0.411087000 | 0.887092000  |
| C | -0.142106000 | 0.650098000  | 0.242419000  |
| C | -0.961923000 | 1.959773000  | 0.152989000  |
| H | -1.219027000 | 2.191555000  | 1.194448000  |
| C | -2.277419000 | 1.753833000  | -0.587071000 |
| C | -2.339176000 | 1.023471000  | -1.783237000 |
| H | -1.433271000 | 0.574830000  | -2.190948000 |
| C | -3.555368000 | 0.833678000  | -2.444607000 |
| H | -3.579853000 | 0.248964000  | -3.367817000 |
| C | -4.732641000 | 1.373972000  | -1.916621000 |
| H | -5.686804000 | 1.219728000  | -2.426906000 |
| C | -4.681006000 | 2.105277000  | -0.725452000 |
| H | -5.596748000 | 2.522156000  | -0.298223000 |
| C | -3.461633000 | 2.293868000  | -0.067882000 |
| H | -3.431388000 | 2.847960000  | 0.873888000  |
| C | -0.144478000 | 3.144094000  | -0.355082000 |
| C | 0.543790000  | 3.941105000  | 0.575049000  |
| H | 0.447555000  | 3.720094000  | 1.641730000  |
| C | 1.357452000  | 4.996659000  | 0.156158000  |
| H | 1.884770000  | 5.602780000  | 0.897140000  |
| C | 1.499582000  | 5.273176000  | -1.207735000 |
| H | 2.137437000  | 6.096388000  | -1.539045000 |
| C | 0.816542000  | 4.491056000  | -2.143849000 |
| H | 0.916670000  | 4.701338000  | -3.211665000 |
| C | -0.002003000 | 3.437792000  | -1.721184000 |
| H | -0.533455000 | 2.839558000  | -2.463382000 |
| C | 2.237220000  | -0.179568000 | -0.116252000 |
| H | 1.872253000  | -1.136429000 | 0.250482000  |
| C | 3.100890000  | -0.409496000 | -1.392560000 |
| H | 2.993098000  | -1.440774000 | -1.756366000 |

|    |              |              |              |
|----|--------------|--------------|--------------|
| H  | 2.785388000  | 0.242137000  | -2.219503000 |
| C  | 4.532349000  | -0.079736000 | -0.918408000 |
| H  | 5.322623000  | -0.533548000 | -1.535805000 |
| C  | 4.622248000  | 1.458422000  | -0.807465000 |
| H  | 4.252481000  | 1.952087000  | -1.719390000 |
| H  | 5.659627000  | 1.794461000  | -0.662358000 |
| C  | 3.739282000  | 1.762251000  | 0.438943000  |
| H  | 4.310645000  | 2.267868000  | 1.231679000  |
| H  | 2.888694000  | 2.423008000  | 0.220582000  |
| C  | 3.274066000  | 0.364172000  | 0.922013000  |
| C  | 4.518540000  | -0.533365000 | 0.573644000  |
| C  | 4.305324000  | -2.046782000 | 0.762520000  |
| H  | 5.200230000  | -2.594469000 | 0.425332000  |
| H  | 3.447396000  | -2.459430000 | 0.216248000  |
| H  | 4.155438000  | -2.287013000 | 1.827372000  |
| C  | 5.789529000  | -0.168517000 | 1.358586000  |
| H  | 5.688934000  | -0.471364000 | 2.413397000  |
| H  | 6.030599000  | 0.902261000  | 1.348604000  |
| H  | 6.657669000  | -0.706450000 | 0.943601000  |
| C  | 2.763336000  | 0.337661000  | 2.351458000  |
| H  | 1.850035000  | 0.946860000  | 2.451207000  |
| H  | 3.512989000  | 0.738987000  | 3.051993000  |
| H  | 2.516590000  | -0.687369000 | 2.666506000  |
| N  | -1.872047000 | 0.592315000  | 2.765726000  |
| N  | -1.891370000 | -0.232157000 | 1.679781000  |
| N  | -0.011374000 | -2.433552000 | -0.252214000 |
| N  | -0.200934000 | -1.729737000 | 0.899113000  |
| N  | 1.086027000  | 0.677345000  | -0.335880000 |
| H  | 1.284597000  | 1.529291000  | -0.847057000 |
| Zn | -0.885637000 | -2.138814000 | -2.318974000 |
| C  | 0.240125000  | -0.868561000 | -3.387912000 |
| H  | 0.562343000  | 0.012516000  | -2.812383000 |
| H  | 1.162167000  | -1.363800000 | -3.744810000 |
| H  | -0.294963000 | -0.505498000 | -4.284524000 |
| C  | -2.350434000 | -3.517128000 | -2.338073000 |
| H  | -2.264841000 | -4.193207000 | -3.209421000 |
| H  | -2.349941000 | -4.148992000 | -1.432466000 |
| H  | -3.351170000 | -3.051854000 | -2.402987000 |



**TS-[6c-ZnMe<sub>2</sub>]**

ZVPE at 353.15 K: -3490.450043

Gibbs Energy at 353.15 K: -3490.547115

|   |              |              |              |
|---|--------------|--------------|--------------|
| C | -3.162764000 | -1.185289000 | 1.348574000  |
| C | -3.976337000 | -0.955375000 | 2.443479000  |
| H | -5.017791000 | -1.250952000 | 2.552551000  |
| C | -3.173602000 | -0.228362000 | 3.367506000  |
| C | -3.562299000 | 0.295302000  | 4.716206000  |
| H | -2.709329000 | 0.807221000  | 5.183986000  |
| H | -3.888761000 | -0.519779000 | 5.383075000  |
| H | -4.399215000 | 1.009465000  | 4.642654000  |
| C | -3.427047000 | -1.827342000 | 0.029154000  |
| H | -3.152936000 | -1.144085000 | -0.790769000 |
| H | -4.492820000 | -2.072986000 | -0.066851000 |
| H | -2.842405000 | -2.751460000 | -0.107232000 |
| C | 0.063828000  | -2.921528000 | 1.510097000  |
| C | 0.428811000  | -4.047038000 | 0.771618000  |
| H | 0.748327000  | -5.007786000 | 1.167442000  |
| C | 0.307578000  | -3.681390000 | -0.581000000 |
| C | 0.001071000  | -2.690628000 | 2.980504000  |
| H | 0.386268000  | -1.691978000 | 3.235856000  |
| H | 0.583803000  | -3.457121000 | 3.508645000  |
| H | -1.038711000 | -2.724988000 | 3.343616000  |
| C | 0.616077000  | -4.462441000 | -1.816539000 |
| H | 0.520702000  | -5.541586000 | -1.633367000 |
| H | 1.647942000  | -4.267389000 | -2.154540000 |
| H | -0.065430000 | -4.184259000 | -2.636238000 |
| C | -0.783565000 | -0.649235000 | 0.851805000  |
| C | -0.183545000 | 0.471692000  | 0.300725000  |
| C | -1.022144000 | 1.778470000  | 0.318790000  |
| H | -1.332199000 | 1.865541000  | 1.368731000  |
| C | -2.317647000 | 1.676664000  | -0.482450000 |
| C | -2.333073000 | 1.428860000  | -1.864826000 |
| H | -1.394539000 | 1.324543000  | -2.408392000 |
| C | -3.535974000 | 1.296807000  | -2.563620000 |
| H | -3.515257000 | 1.085886000  | -3.635204000 |
| C | -4.755689000 | 1.420159000  | -1.891150000 |
| H | -5.698093000 | 1.312959000  | -2.434227000 |
| C | -4.756917000 | 1.676304000  | -0.516554000 |
| H | -5.702370000 | 1.766442000  | 0.024692000  |
| C | -3.549817000 | 1.803009000  | 0.176601000  |
| H | -3.561551000 | 1.973977000  | 1.255756000  |
| C | -0.208282000 | 3.029668000  | 0.027500000  |
| C | -0.022192000 | 3.970893000  | 1.050508000  |
| H | -0.471968000 | 3.789541000  | 2.030875000  |
| C | 0.740148000  | 5.126551000  | 0.845587000  |
| H | 0.872721000  | 5.841248000  | 1.662205000  |
| C | 1.332095000  | 5.360926000  | -0.397402000 |
| H | 1.932583000  | 6.259262000  | -0.562940000 |
| C | 1.149227000  | 4.433477000  | -1.429855000 |
| H | 1.610939000  | 4.603031000  | -2.406243000 |
| C | 0.387881000  | 3.282663000  | -1.218093000 |
| H | 0.274827000  | 2.567863000  | -2.030249000 |
| C | 2.126799000  | -0.256984000 | 0.376378000  |
| H | 1.756499000  | -0.678603000 | 1.321857000  |
| C | 2.836417000  | -1.397163000 | -0.437256000 |
| H | 2.647082000  | -2.379465000 | 0.017135000  |

|    |              |              |              |
|----|--------------|--------------|--------------|
| H  | 2.476951000  | -1.457037000 | -1.471089000 |
| C  | 4.330210000  | -1.015738000 | -0.373944000 |
| H  | 5.013774000  | -1.857468000 | -0.570297000 |
| C  | 4.534488000  | 0.192872000  | -1.313154000 |
| H  | 4.103832000  | 0.004471000  | -2.308685000 |
| H  | 5.603034000  | 0.406235000  | -1.467452000 |
| C  | 3.818341000  | 1.344897000  | -0.548123000 |
| H  | 4.502123000  | 2.179084000  | -0.328913000 |
| H  | 2.963665000  | 1.772601000  | -1.088999000 |
| C  | 3.329050000  | 0.675269000  | 0.759959000  |
| C  | 4.461532000  | -0.377167000 | 1.040837000  |
| C  | 4.176670000  | -1.355715000 | 2.195146000  |
| H  | 4.997126000  | -2.087666000 | 2.279100000  |
| H  | 3.244891000  | -1.925959000 | 2.085266000  |
| H  | 4.120294000  | -0.815492000 | 3.154158000  |
| C  | 5.838127000  | 0.246352000  | 1.326767000  |
| H  | 5.849776000  | 0.708071000  | 2.327460000  |
| H  | 6.134095000  | 1.022142000  | 0.608794000  |
| H  | 6.619152000  | -0.532366000 | 1.314798000  |
| C  | 2.985998000  | 1.656294000  | 1.866175000  |
| H  | 2.180411000  | 2.329641000  | 1.537043000  |
| H  | 3.855752000  | 2.276393000  | 2.138581000  |
| H  | 2.637756000  | 1.135524000  | 2.773859000  |
| N  | -1.947934000 | -0.043684000 | 2.886537000  |
| N  | -1.947320000 | -0.624580000 | 1.654727000  |
| N  | -0.121012000 | -2.413812000 | -0.659326000 |
| N  | -0.263671000 | -1.952458000 | 0.614203000  |
| N  | 1.044571000  | 0.484414000  | -0.256026000 |
| H  | 0.962014000  | 0.275208000  | -1.624668000 |
| Zn | -0.514595000 | -1.304215000 | -2.314405000 |
| C  | 1.084129000  | 0.135805000  | -2.994143000 |
| H  | 2.014542000  | 0.712350000  | -2.870689000 |
| H  | 1.402949000  | -0.762549000 | -3.559780000 |
| H  | 0.431207000  | 0.733352000  | -3.651131000 |
| C  | -1.843165000 | -1.663328000 | -3.749598000 |
| H  | -1.840236000 | -0.857020000 | -4.502327000 |
| H  | -1.628569000 | -2.610992000 | -4.275292000 |
| H  | -2.863955000 | -1.735029000 | -3.338485000 |

**[6c-ZnMe]**

ZVPE at 353.15 K: -3450.068995

Gibbs Energy at 353.15 K: -3450.167451

|   |              |              |              |
|---|--------------|--------------|--------------|
| C | 3.650556000  | -0.069495000 | 1.024727000  |
| C | 4.861597000  | 0.562541000  | 0.807581000  |
| H | 5.647630000  | 0.735190000  | 1.540060000  |
| C | 4.851181000  | 0.939997000  | -0.565023000 |
| C | 5.920014000  | 1.656389000  | -1.332238000 |
| H | 5.582115000  | 1.855563000  | -2.359174000 |
| H | 6.846392000  | 1.059927000  | -1.380633000 |
| H | 6.176438000  | 2.617165000  | -0.856585000 |
| C | 3.033573000  | -0.647704000 | 2.256022000  |
| H | 2.166691000  | -0.046384000 | 2.579117000  |
| H | 3.762941000  | -0.664693000 | 3.076973000  |
| H | 2.672716000  | -1.673771000 | 2.081304000  |
| C | 2.012085000  | -2.525129000 | -1.918532000 |
| C | 1.784032000  | -3.890307000 | -1.761748000 |
| H | 1.989793000  | -4.668088000 | -2.493494000 |
| C | 1.212609000  | -4.046141000 | -0.482577000 |
| C | 2.541047000  | -1.757721000 | -3.081746000 |
| H | 1.828959000  | -0.967637000 | -3.370016000 |
| H | 2.697677000  | -2.429901000 | -3.935947000 |
| H | 3.481820000  | -1.246169000 | -2.834164000 |
| C | 0.725451000  | -5.286811000 | 0.196516000  |
| H | 1.560548000  | -5.973521000 | 0.409774000  |
| H | 0.007708000  | -5.829298000 | -0.438813000 |
| H | 0.233671000  | -5.035975000 | 1.146853000  |
| C | 1.679714000  | -0.549571000 | -0.406069000 |
| C | 0.535993000  | 0.154421000  | -0.065694000 |
| C | 0.729846000  | 1.670701000  | 0.160106000  |
| H | 1.810583000  | 1.826430000  | 0.060586000  |
| C | 0.399022000  | 2.186225000  | 1.558979000  |
| C | -0.397954000 | 1.510694000  | 2.493588000  |
| H | -0.838396000 | 0.553324000  | 2.230930000  |
| C | -0.629384000 | 2.047247000  | 3.766624000  |
| H | -1.255078000 | 1.495689000  | 4.473408000  |
| C | -0.069532000 | 3.272847000  | 4.130486000  |
| H | -0.251952000 | 3.692350000  | 5.123147000  |
| C | 0.733875000  | 3.957061000  | 3.209759000  |
| H | 1.186111000  | 4.914661000  | 3.481114000  |
| C | 0.965992000  | 3.416069000  | 1.944979000  |
| H | 1.596722000  | 3.957152000  | 1.233878000  |
| C | 0.145560000  | 2.505904000  | -0.985869000 |
| C | 0.685549000  | 2.332437000  | -2.271354000 |
| H | 1.514894000  | 1.632693000  | -2.406297000 |
| C | 0.178069000  | 3.045056000  | -3.359777000 |
| H | 0.607628000  | 2.893907000  | -4.353735000 |
| C | -0.873701000 | 3.951083000  | -3.180614000 |
| H | -1.275420000 | 4.505956000  | -4.032311000 |
| C | -1.397896000 | 4.149268000  | -1.899717000 |
| H | -2.212843000 | 4.861164000  | -1.744508000 |
| C | -0.887676000 | 3.435398000  | -0.810037000 |
| H | -1.307922000 | 3.596483000  | 0.184490000  |
| C | -1.891710000 | 0.179301000  | -0.269914000 |
| H | -1.894182000 | 1.191913000  | 0.159143000  |
| C | -2.117659000 | 0.280066000  | -1.819775000 |
| H | -2.009752000 | 1.312015000  | -2.175794000 |

|    |              |              |              |
|----|--------------|--------------|--------------|
| H  | -1.369383000 | -0.325002000 | -2.352601000 |
| C  | -3.548324000 | -0.256818000 | -2.022518000 |
| H  | -4.022635000 | 0.076454000  | -2.958981000 |
| C  | -3.496995000 | -1.788781000 | -1.856426000 |
| H  | -2.692496000 | -2.233498000 | -2.461906000 |
| H  | -4.437814000 | -2.265742000 | -2.170029000 |
| C  | -3.250006000 | -1.954391000 | -0.330344000 |
| H  | -4.047999000 | -2.528499000 | 0.163347000  |
| H  | -2.320940000 | -2.505570000 | -0.130694000 |
| C  | -3.211563000 | -0.499709000 | 0.215804000  |
| C  | -4.268287000 | 0.204861000  | -0.722243000 |
| C  | -4.360672000 | 1.734130000  | -0.574134000 |
| H  | -5.100393000 | 2.132205000  | -1.287895000 |
| H  | -3.418909000 | 2.263851000  | -0.760671000 |
| H  | -4.703134000 | 2.006784000  | 0.437408000  |
| C  | -5.700987000 | -0.334392000 | -0.566388000 |
| H  | -6.147726000 | 0.023017000  | 0.375411000  |
| H  | -5.773534000 | -1.429687000 | -0.565533000 |
| H  | -6.332817000 | 0.037454000  | -1.389687000 |
| C  | -3.467727000 | -0.382303000 | 1.711024000  |
| H  | -2.711031000 | -0.928084000 | 2.293251000  |
| H  | -4.448566000 | -0.806467000 | 1.978782000  |
| H  | -3.444937000 | 0.668818000  | 2.038490000  |
| N  | 3.717167000  | 0.566979000  | -1.148963000 |
| N  | 2.989049000  | -0.051487000 | -0.177906000 |
| N  | 1.121688000  | -2.850195000 | 0.113593000  |
| N  | 1.612903000  | -1.927980000 | -0.763308000 |
| N  | -0.648656000 | -0.495540000 | 0.095938000  |
| Zn | -0.441480000 | -2.082846000 | 1.275736000  |
| C  | -1.078569000 | -3.021561000 | 2.903559000  |
| H  | -1.258128000 | -2.325738000 | 3.741527000  |
| H  | -0.347759000 | -3.772433000 | 3.250689000  |
| H  | -2.030679000 | -3.546206000 | 2.710124000  |

## ZnMe<sub>2</sub>

ZVPE at 353.15 K: -1858.891031

Gibbs Energy at 353.15 K: -1858.929368

|    |              |              |              |
|----|--------------|--------------|--------------|
| C  | 1.974781000  | -0.000596000 | 0.000137000  |
| Zn | 0.000000000  | 0.000417000  | -0.000102000 |
| H  | 2.382593000  | 0.313039000  | -0.977302000 |
| H  | 2.381285000  | -1.004461000 | 0.217216000  |
| H  | 2.382464000  | 0.688799000  | 0.760818000  |
| C  | -1.974800000 | -0.000560000 | 0.000132000  |
| H  | -2.381517000 | -0.697844000 | -0.753843000 |
| H  | -2.381571000 | -0.305620000 | 0.980723000  |
| H  | -2.383140000 | 1.000502000  | -0.226152000 |

## CH<sub>4</sub>

ZVPE at 353.15 K: -40.44373 Ha

Gibbs Energy at 353.15 K: -40.465042 Ha

|   |              |              |              |
|---|--------------|--------------|--------------|
| C | 0.000000000  | 0.000000000  | 0.000000000  |
| H | 0.634983000  | 0.634983000  | 0.634983000  |
| H | -0.634983000 | -0.634983000 | 0.634983000  |
| H | 0.634983000  | -0.634983000 | -0.634983000 |
| H | -0.634983000 | 0.634983000  | -0.634983000 |

## 1.2. References

- (1) M.J. Frisch, G.W. Trucks, H.B. Schlegel, G.E. Scuseria, M.A. Robb, J.R. Cheeseman, G. Scalmani, V. Barone, G.A. Petersson, H. Nakatsuji, X. Li, M. Caricato, A.V. Marenich, J. Bloino, B.G. Janesko, R. Gomperts, B. Mennucci, H.P. Hratchian, J.V. Ortiz, A.F. Izmaylov, J.L. Sonnenberg, D. Williams-Young, F. Ding, F. Lipparini, F. Egidi, J. Goings, B. Peng, A. Petrone, T. Henderson, D. Ranasinghe, V.G. Zakrzewski, J. Gao, N. Rega, G. Zheng, W. Liang, M. Hada, M. Ehara, K. Toyota, R. Fukuda, J. Hasegawa, M. Ishida, T. Nakajima, Y. Honda, O. Kitao, H. Nakai, T. Vreven, K. Throssell, J. Montgomery, J.A., J.E. Peralta, F. Ogliaro, M.J. Bearpark, J.J. Heyd, E.N. Brothers, K.N. Kudin, V.N. Staroverov, T.A. Keith, R. Kobayashi, J. Normand, K. Raghavachari, A.P. Rendell, J.C. Burant, S.S. Iyengar, J. Tomasi, M. Cossi, J.M. Millam, M. Klene, C. Adamo, R. Cammi, J.W. Ochterski, R.L. Martin, K. Morokuma, O. Farkas, J.B. Foresman, D.J. Fox, Gaussian 16, Revision B.01, (2016).
- (2) a) A. D. Becke, *Phys. Rev. A* **1988**, *38*, 3098; b) J. P. Perdew, *Phys. Rev. B* **1986**, *33*, 8822.
- (3) S. Grimme, J. Antony, S. Ehrlich, H. Krieg, *J. Chem. Phys.* **2010**, *132*, 154104.
- (4) K. Eichkorn, O. Treutler, H. Öhm, M. Häser, R. Ahlrichs, *Chem. Phys. Lett.* **1995**, *242*, 652.
- (5) a) S. Miertuš, E. Scrocco and J. Tomasi, *Chem. Phys.* **1981**, *55*, 117; b) J. L. Pascual-Ahuir, E. Silla, I. Tuñón, *J. Comput. Chem.* **1994**, *15*, 1127; c) V. Barone, M. Cossi, *J. Phys. Chem. A* **1998**, *102*, 1995.
- (6) Grimme, S. *Chem. — Eur. J.* **2012**, *18*, 9955–9964.
- (7) Luchini, G.; Alegre-Requena, J. V.; Funes-Ardoiz, I.; Paton, R. S. GoodVibes: automated thermochemistry for heterogeneous computational chemistry data. *F1000 Research* **2020**, *9*, 291
